# Supplementary material for: Trajectories of Depressive Individual Symptoms over Time during Transcranial Photobiomodulation
Source: MDPI journal article supplement (doi:10.3390/photonics10121324), 2023-11-29
Supplement: s1 [file s1]

Archive with 1 entries (1 files):
- photonics-2556320-supplementary.pdf
