# Supplementary material for: Trajectories of Depressive Individual Symptoms over Time during Transcranial Photobiomodulation
Source: MDPI journal article supplement (doi:10.3390/photonics10121324), 2023-11-29
Supplement: s1 [file s1 › photonics-2556320-supplementary.pdf]

Supplementary Figure 1. Trajectories of individual symptoms over time during tPBM in responders and non-responders (All symptoms)

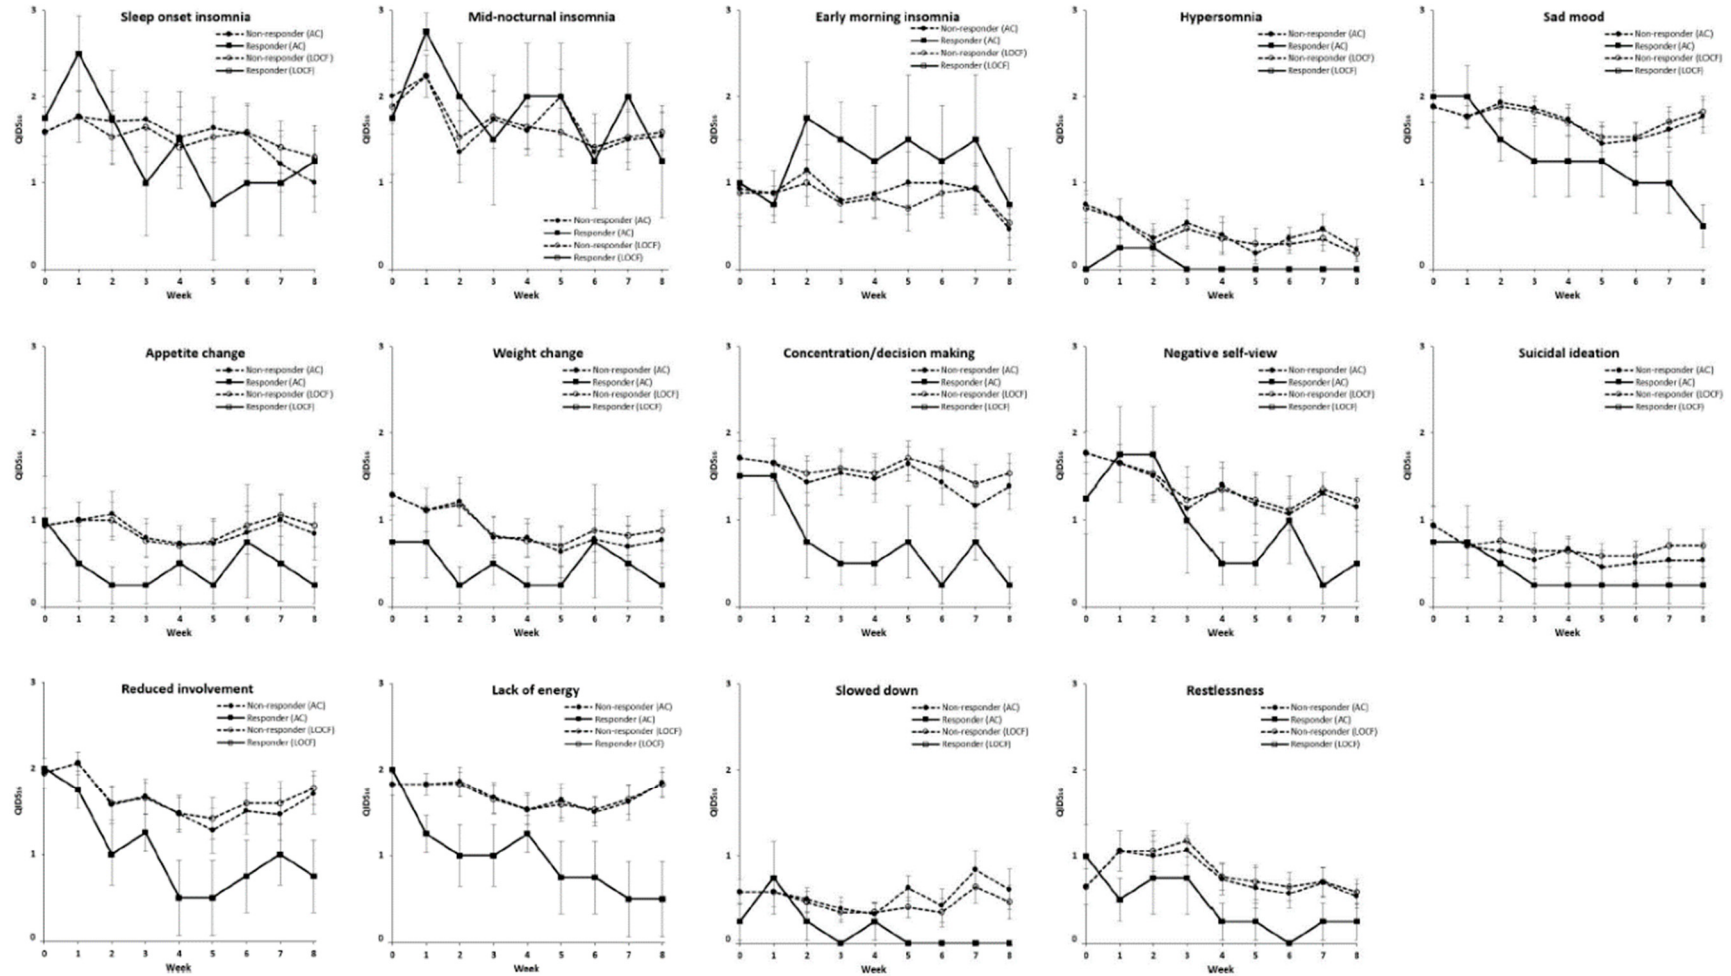

AC, available-case; LOCF, last observation carried forward; t-PBM, transcranial photobiomodulation
